# Supplementary material for: Integrative Transcriptome, miRNAs, Degradome, and Phytohormone Analysis of Brassica rapa L. in Response to Plasmodiophora brassicae
Source: MDPI journal article supplement (doi:10.3390/ijms24032414), 2023-01-26
Supplement: s1 [file s1]

**Table S1** Statistics of small RNA sequencing data output

| sample  | Raw read | Q 30(%) | Containing 'N' read R | Length < 18 | Length > 30 | Clean read |
|---------|----------|---------|-----------------------|-------------|-------------|------------|
| S-0d-1  | 18989492 | 97.61   | 69                    | 4982667     | 1168895     | 12837861   |
| S-0d-2  | 21981402 | 96.9    | 47                    | 8140437     | 1060361     | 12780557   |
| S-0d-3  | 20782377 | 96.31   | 29                    | 7341797     | 1662314     | 11778237   |
| S-3d-1  | 17487760 | 97.27   | 37                    | 4859922     | 780262      | 11847539   |
| S-3d-2  | 14971147 | 97.47   | 53                    | 2955050     | 1187505     | 10828539   |
| S-3d-3  | 13048923 | 97.28   | 48                    | 1873000     | 1167351     | 10008524   |
| S-9d-1  | 16065904 | 97.33   | 59                    | 4839820     | 977868      | 10248157   |
| S-9d-2  | 18951086 | 96.92   | 32                    | 5983845     | 1057915     | 11909294   |
| S-9d-3  | 17780071 | 97.32   | 47                    | 5426652     | 1036765     | 11316607   |
| S-20d-1 | 14494273 | 97.27   | 56                    | 177677      | 495517      | 13821023   |
| S-20d-2 | 12941257 | 97.6    | 38                    | 1306386     | 210856      | 11423977   |
| S-20d-3 | 12919070 | 97.04   | 31                    | 286677      | 393097      | 12239265   |
| R-0d-1  | 22798822 | 97.44   | 80                    | 3857954     | 3701283     | 15239505   |
| R-0d-2  | 20886549 | 97.3    | 62                    | 3681544     | 2139338     | 15065605   |
| R-0d-3  | 23551608 | 97.31   | 70                    | 6532371     | 2577496     | 14441671   |
| R-3d-1  | 25170621 | 96.61   | 158                   | 3494079     | 2002362     | 19674022   |
| R-3d-2  | 36631238 | 96.74   | 283                   | 9617040     | 1376534     | 25637381   |
| R-3d-3  | 15075627 | 96.65   | 129                   | 587774      | 3234760     | 11252964   |
| R-9d-1  | 20971555 | 96.61   | 148                   | 1089336     | 4679063     | 15203008   |
| R-9d-2  | 16166735 | 94.94   | 64                    | 2859941     | 1883337     | 11423393   |
| R-9d-3  | 18761498 | 96.6    | 87                    | 3251017     | 2867736     | 12642658   |
| R-20d-1 | 17683059 | 96.85   | 51                    | 2032261     | 2626745     | 13024002   |
| R-20d-2 | 16422681 | 97.49   | 47                    | 2867285     | 1901296     | 11654053   |
| R-20d-3 | 16426816 | 97.42   | 54                    | 3451091     | 1119736     | 11855935   |
